# Supplementary material for: Enhanced electrochemical performance of hierarchical CoFe2O4/MnO2/C nanotubes as anode materials for lithium-ion batteries
Source: Royal Society of Chemistry journal article supplement (doi:10.1039/c5ta02305j), 2015-01-01
Supplement: c5ta02305j1.pdf [file c5ta02305j1.pdf]

Supporting Information for

**Enhanced Electrochemical Performance of Hierarchical  
Architecture  $\text{CoFe}_2\text{O}_4/\text{MnO}_2/\text{C}$  Nanotubes as Anode  
Material for Lithium-Ion Batteries**

Junjie Zhou<sup>ab</sup>, Ting Yang<sup>a</sup>, Minglei Mao<sup>a</sup>, Weiji Ren<sup>a</sup>, Qihong Li<sup>\*ab</sup>

<sup>a</sup> Key laboratory for Micro-/Nano-Optoelectronic Devices of Ministry of Education, School of Physics and Electronics, Hunan University, Changsha 410082, China. E-mail address: liqihong@xmu.edu.cn. Tel.: 86-592-2187198.

<sup>b</sup> Pen-Tung Sah Institute of Micro-Nano Science and Technology of Xiamen University, Xiamen, 361005, China.

**Table S1.** Comparative electrochemical performance of reported CoFe<sub>2</sub>O<sub>4</sub> and MnO<sub>2</sub> materials

| Electrode materials                                                                   | Capacitance (mAh g <sup>-1</sup> ) | Cycle number | Current density         | References |
|---------------------------------------------------------------------------------------|------------------------------------|--------------|-------------------------|------------|
| CoFe <sub>2</sub> O <sub>4</sub> thin films                                           | 592                                | 30th         | 100 mA g <sup>-1</sup>  | 11         |
| Macroporous CoFe <sub>2</sub> O <sub>4</sub>                                          | 531                                | 30th         | 0.2 mA cm <sup>-2</sup> | 15         |
| Nanocrystalline CoFe <sub>2</sub> O <sub>4</sub>                                      | 350                                | 100th        | 10 μA cm <sup>-2</sup>  | 10         |
| porous CoFe <sub>2</sub> O <sub>4</sub> nanosheets                                    | 648                                | 200th        | 2000 mA g <sup>-1</sup> | S1         |
| CoFe <sub>2</sub> O <sub>4</sub> nanoparticles                                        | 200                                | 50th         | 100 mA g <sup>-1</sup>  | 14         |
| CoFe <sub>2</sub> O <sub>4</sub> /C composite fibers                                  | 320                                | 100th        | 200 mA g <sup>-1</sup>  | 13         |
| Mesoporous CoFe <sub>2</sub> O <sub>4</sub> nanospheres/ carbon nanotube              | 1045.6                             | 100th        | 200 mA g <sup>-1</sup>  | S2         |
| Co <sub>3</sub> O <sub>4</sub> /CoFe <sub>2</sub> O <sub>4</sub> nanocomposite        | 400                                | 60th         | 100 mA g <sup>-1</sup>  | 9          |
| Coaxial Carbon Nanotube@MnO <sub>2</sub>                                              | 500                                | 16th         | 50 mA g <sup>-1</sup>   | S3         |
| Nanoflaky MnO <sub>2</sub> /carbon nanotube nanocomposites                            | 620                                | 50th         | 200 mA g <sup>-1</sup>  | 26         |
| Nanoflaky MnO <sub>2</sub> -graphene sheet                                            | 230                                | 150th        | 200 mA g <sup>-1</sup>  | S4         |
| Mn <sub>3</sub> O <sub>4</sub> nanorod @ Zn <sub>2</sub> SnO <sub>4</sub> nanoneedles | 577.4                              | 50th         | 100 mA g <sup>-1</sup>  | 4          |
| CoFe <sub>2</sub> O <sub>4</sub> /MnO <sub>2</sub> /C Nanocomposite                   | 713.6                              | 250th        | 100 mA g <sup>-1</sup>  | This work  |

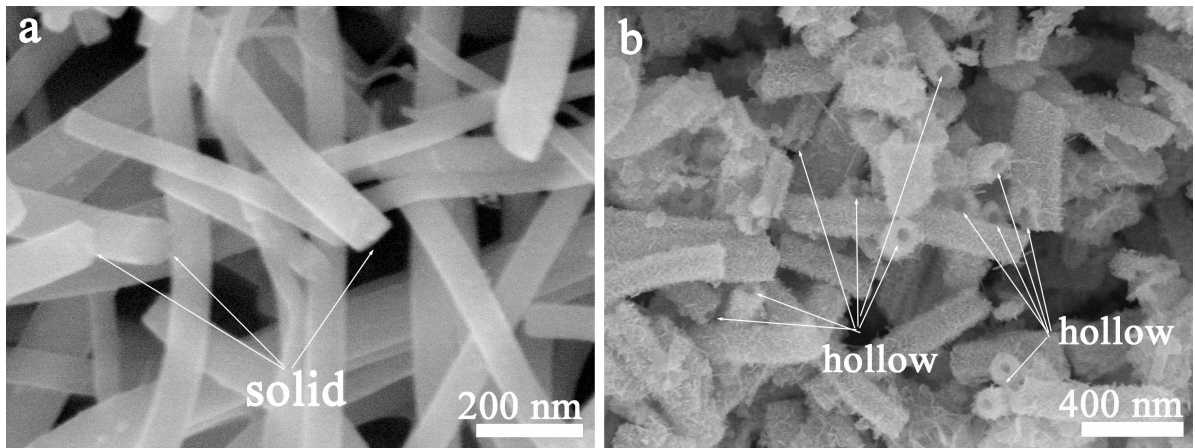

**Figure S1** SEM images of (a)  $\text{CoFe}_2\text{O}_4/\text{C}$  nanofibers; (b)  $\text{CoFe}_2\text{O}_4/\text{MnO}_2/\text{C}$  composite.

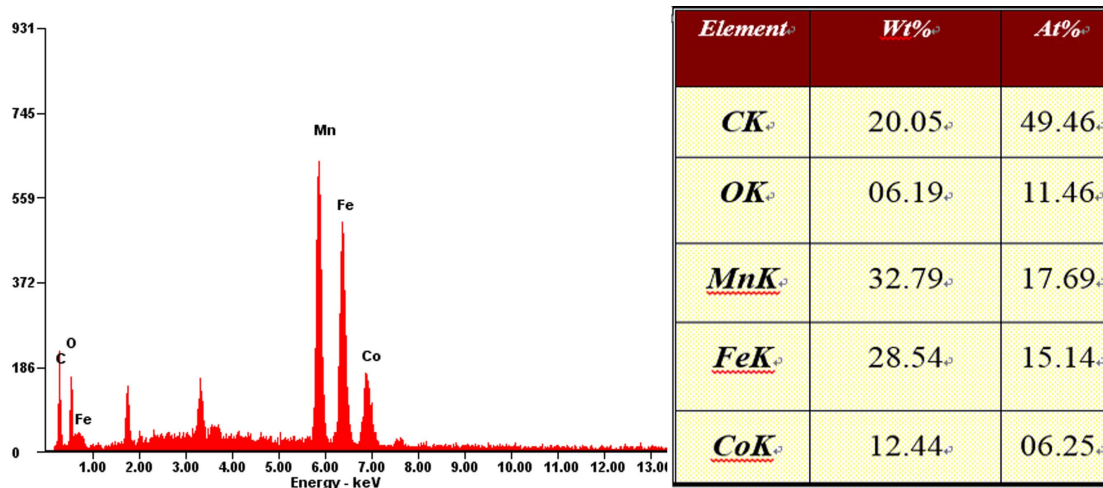

**Figure S2** EDS spectrum of the  $\text{CoFe}_2\text{O}_4/\text{MnO}_2/\text{C}$  nanocomposite.

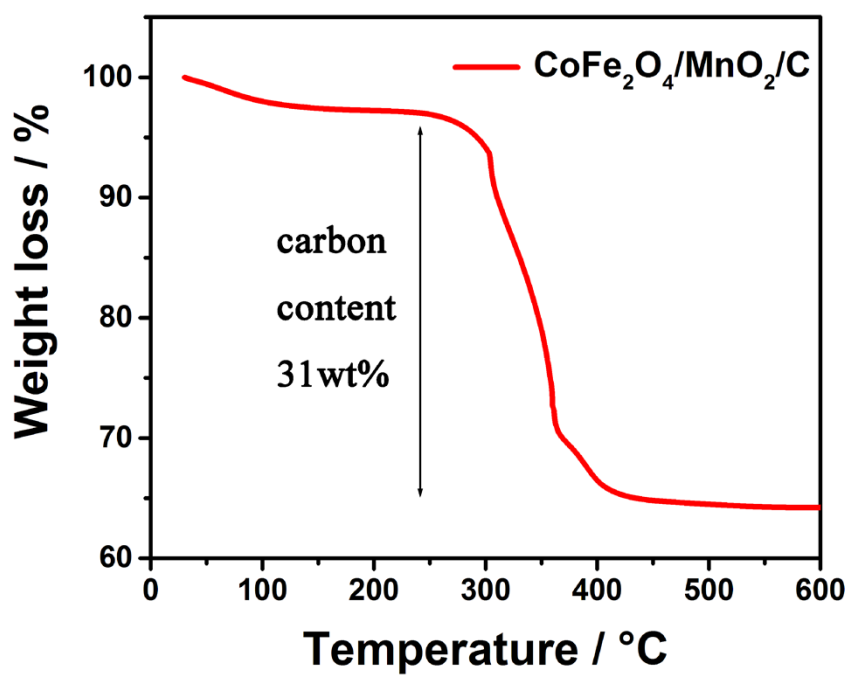

**Figure S3** TGA curve of the CoFe<sub>2</sub>O<sub>4</sub>/MnO<sub>2</sub>/C nanocomposite.

## References

- S1. X. Yao, J. Kong, X. Tang, D. Zhou, C. Zhao, R. Zhou and X. Lu, *RSC Advances*, 2014, 4, 27488-27492.
- S2. Z. Zhang, Y. Wang, M. Zhang, Q. Tan, X. Lv, Z. Zhong and F. Su, *Journal of Materials Chemistry A*, 2013, 1, 7444-7450.
- S3. A. L. M. Reddy, M. M. Shaijumon, S. R. Gowda and P. M. Ajayan, *Nano Letters*, 2009, 9, 1002-1006
- S4. J. Li, Y. Zhao, N. Wang, Y. Ding and L. Guan, *Journal of Materias Chemistry*, 2012, 22, 13002-13004
